# Supplementary material for: Clinical and economic outcomes associated with use of anti-arrhythmic drugs versus ablation in atrial fibrillation
Source: Atypon-hosted journal article supplement (doi:10.57264/cer-2023-0065), 2023-06-30
Supplement: supplementary tables.docx [file supplementary%20tables.docx]

**Supplementary table 1: Risk of occurrence of LTCO in direct comparison of individual drugs scenario**

| **Therapy** | **LTCOs** | **Risk Ratio** | **LTCO risk for reference AFib population** | **LTCO risk for AADs** |
| --- | --- | --- | --- | --- |
| Dronedarone | Withdrawal due to AE | 1.58 | 0.07 | 0.1183 |
| Proarrhythmia | 1.95 | 0.18 | 0.3560 |
| Stroke | 0.66 | 0.06 | 0.0389 |
| AFib Recurrence | 0.85 | 0.53 | 0.4537 |
| Amiodarone | Withdrawal due to AE | 6.7 | 0.07 | 0.5016 |
| Proarrhythmia | 2.22 | 0.18 | 0.4052 |
| Stroke | 1.15 | 0.06 | 0.0678 |
| AFib Recurrence | 0.52 | 0.53 | 0.2776 |
| Sotalol | Withdrawal due to AE | 1.95 | 0.07 | 0.1460 |
| Proarrhythmia | 3.55 | 0.18 | 0.6480 |
| Stroke | 1.47 | 0.06 | 0.0866 |
| AFib Recurrence | 0.83 | 0.53 | 0.4430 |
| Flecainide | Withdrawal due to AE | 15.41 | 0.07 | 1.1538 |
| Proarrhythmia | 4.8 | 0.18 | 0.8762 |
| Stroke | 2.04 | 0.06 | 0.1202 |
| AFib Recurrence | 0.65 | 0.53 | 0.3469 |
| Propafenone | Withdrawal due to AE | 1.62 | 0.07 | 0.1213 |
| Proarrhythmia | 1.32 | 0.18 | 0.2410 |
| Stroke1 | - | 0.06 | - |
| AFib Recurrence | 0.67 | 0.53 | 0.3576 |
| Dofetilide | Withdrawal due to AE | 1.77 | 0.07 | 0.1325 |
| Proarrhythmia | 5.5 | 0.18 | 1.0040 |
| Stroke2 | - | 0.06 | - |
| AFib Recurrence | 0.72 | 0.53 | 0.3843 |
| AADs (Group)3 | Withdrawal due to AE | - | 0.623 | - |
| Proarrhythmia | - | 0.776 | - |
| Stroke | - | 0.067 | - |
| AFib Recurrence | - | 0.380 | - |

AADs: antiarrhythmic drugs; AE: adverse event; AFib: atrial fibrillation; LTCO: long-term clinical outcome.
Note: *Risk ratios were obtained from a 2019 meta-analysis by Valembois, et al1. This source does not include risk ratios for stroke in dofetilide and propafenone.

1Risk of stroke in propafenone was obtained from Freemantle, et al. (2011).

2 Risk of stroke in dofetilide was calculated as the average of risk of stroke among class 3 drugs.

3Risk of LTCOs for AADs (Group) is calculated as the weighted average of the risk of all the AADs considered.

Valembois L, Audureau E, Takeda A, Jarzebowski W, Belmin J, Lafuente-Lafuente C. Antiarrhythmics for maintaining sinus rhythm after cardioversion of atrial fibrillation. Cochrane Database Syst Rev 9 CD005049 (2019).

Freemantle N, Lafuente-Lafuente C, Mitchell S, Eckert L, Reynolds M. Mixed treatment comparison of dronedarone, amiodarone, sotalol, flecainide, and propafenone, for the management of atrial fibrillation. Europace. 2011;13(3):329-345. doi:10.1093/europace/euq450

**Supplementary table 2: LTCO risk of treatments (non-temporal scenarios)**

| **Treatment** | **Withdrawal due to AE** | **Proarrhythmia** | **Stroke** | **AFib recurrence** |
| --- | --- | --- | --- | --- |
| Dronedarone + Ablation | 0.124 | 0.095 | 0.012 | 0.496 |
| Amiodarone + Ablation | 0.123 | 0.098 | 0.028 | 0.420 |
| Sotalol + Ablation | 0.109 | 0.119 | 0.025 | 0.455 |
| Flecanide + Ablation | 0.064 | 0.057 | 0.014 | 0.453 |
| Propafenone + Ablation | 0.081 | 0.081 | 0.014 | 0.514 |
| Dofetilide + Ablation | 0.130 | 0.099 | 0.015 | 0.527 |
| AADs (Group) + Ablation | 0.099 | 0.086 | 0.019 | 0.458 |

AE: adverse event; LTCO: long-term clinical outcome.
Note: Risk values were captured from a retrospective database analysis.

**Supplementary table 3: LTCO risk of treatments (temporal scenarios)**

| **Treatment** | **Withdrawal due to AE** | **Proarrhythmia** | **Stroke** | **AFib recurrence** |
| --- | --- | --- | --- | --- |
| AADs before ablation | 0.082 | 0.082 | 0.011 | 0.422 |
| Ablation before AADs | 0.112 | 0.394 | 0.028 | 0.307 |

AADs: antiarrhythmic drugs; AE: adverse event; LTCO: long-term clinical outcome.
Note: Risk values were captured from a retrospective database analysis.
